# Supplementary material for: Crotoxin Conjugated to SBA-15 Nanostructured Mesoporous Silica Induces Long-Last Analgesic Effect in the Neuropathic Pain Model in Mice
Source: MDPI journal article supplement (doi:10.3390/toxins11120679), 2019-11-20
Supplement: s1 [file s1]

# Supplementary Materials: Crotoxin Conjugated to SBA-15 Nanostructured Mesoporous Silica Induces Long-Last Analgesic Effect in the Neuropathic Pain Model in Mice

Morena Brazil Sant’Anna, Flavia Souza Ribeiro Lopes, Louise Faggionato Kimura, Aline Carolina Giardini, Osvaldo Augusto Sant’Anna and Gisele Picolo

**Table S1.** Evaluation of lethality induced by CTX and CTX:SBA-15. The survival time of each animal was followed for 48 hours after administration (i.p.) of CTX (600, 300, 150, 75, 37.5 and 18.75 µg/kg) or complex CTX:SBA-15 (424, 212, 106, 53 and 26.5 µg/kg).

| Compound   | LD <sub>50</sub> (µg/kg) | 95% Confidence Intervals (µg/kg) |
|------------|--------------------------|----------------------------------|
| CTX        | 106                      | 63.2–177.9                       |
| CTX:SBA-15 | 143.2                    | 70.4–291.2                       |

CTX- Crotoxin; CTX:SBA-15- CTX absorbed to SBA-15.

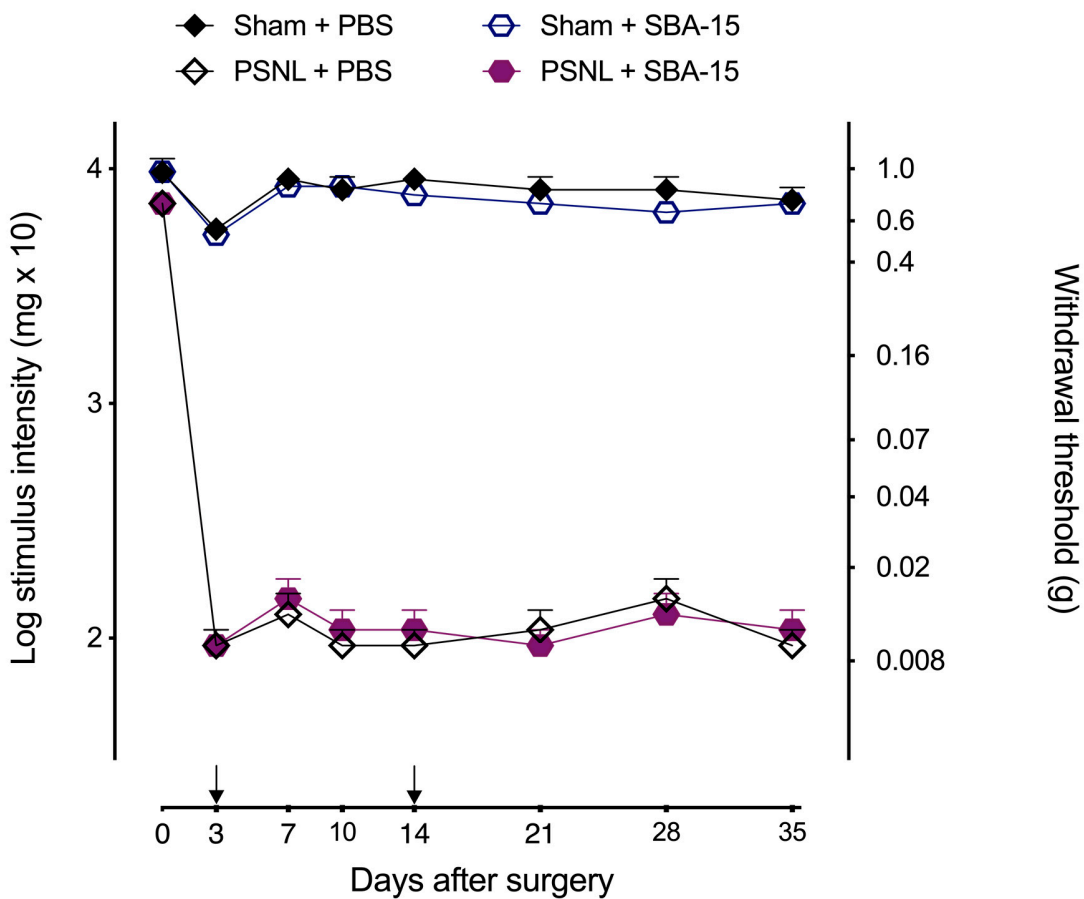

**Figure S1.** Effects of SBA-15 on mechanical hypernociception induced by PSNL. The pain threshold of the animals underwent surgery (sham and PSNL) was evaluated from day 0 (baseline) to 35th days after PSNL. Measurements were performed 1 hour after a single administration of SBA-15 (486 µg/kg, s.c.) on the 3rd

and 14th days after surgery. Arrows indicate the days of SBA-15 administration. The nociceptive threshold was assessed using the von Frey filaments. Results are expressed as mean ( $\pm$  SEM)  $n = 6$ .

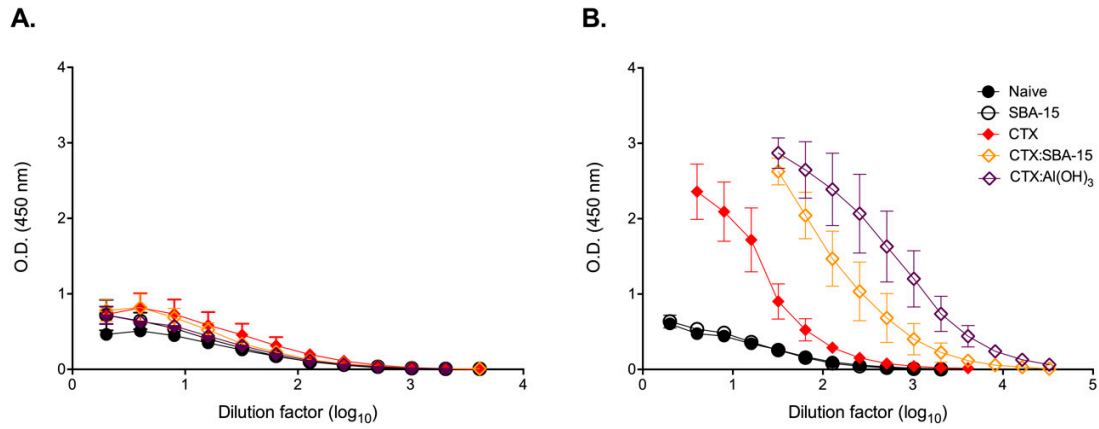

**Figure S2.** Titration of anti-CTX antibodies after administration of CTX and CTX:SBA-15 in H<sub>III</sub> mice. Representative curves obtained after the first dose (A) and booster dose (B) of SBA-15 (486  $\mu$ g/kg, s.c.), CTX (40  $\mu$ g/kg, s.c.), CTX:SBA-15 (54  $\mu$ g/kg, s.c.) or CTX:Al(OH)<sub>3</sub> (54  $\mu$ g/kg, s.c.). Results are expressed as the mean ( $\pm$  SEM)  $n = 4-5$ .
